# Supplementary material
Source: PubMed Central journal article supplement (PMC3865388)
Supplement: ejhg2013101x3.pdf [file ejhg2013101x3.pdf]

**Table S1. Clinical features of WBS patients.** NA, not available. “+” stands for present; “-” stands for not present. A more exhaustive description of neuropsychological testing was reported in Table 1.

| Clinical features       |                                          | WBS154   | WBS166   | WBS160 | WBS179 |
|-------------------------|------------------------------------------|----------|----------|--------|--------|
| Intellectual Disability |                                          | Moderate | Moderate | Severe | Severe |
| Cardiovascular          | Supravalvular aortic stenosis            | -        | +        | -      | -      |
|                         | Peripheral pulmonary stenosis            | -        | +        | -      | +      |
|                         | Valvular pulmonic stenosis               | -        | -        | -      | +      |
|                         | Hypertension                             | -        | +        | -      | -      |
|                         | Others                                   | -        | -        | -      | -      |
| Craniofacial            | Wide mouth                               | -        | -        | +      | +      |
|                         | Prominent ear lobes                      | -        | -        | -      | -      |
|                         | Dolicocephaly                            | -        | -        | -      | -      |
|                         | Broad forehead                           | -        | -        | -      | +      |
|                         | Microcephaly                             | +        | -        | +      | +      |
|                         | Bitemporal narrowing                     | +        | -        | +      | -      |
|                         | Periorbital fullness                     | +        | +        | +      | +      |
|                         | Epicanthal folds                         | -        | +        | +      | +      |
|                         | Stellate irides                          | -        | -        | +      | -      |
|                         | Malar flattening                         | +        | +        | +      | +      |
|                         | Short upturned nose                      | -        | -        | +      | +      |
|                         | Bulbous nasal tip                        | -        | -        | -      | -      |
|                         | Bridge nose flattened                    | -        | -        | -      | -      |
|                         | Long philtrum                            | +        | -        | +      | +      |
|                         | Full lips                                | +        | -        | +      | +      |
|                         | Full cheeks                              | +        | +        | +      | +      |
|                         | Dental abnormalities/malocclusion        | -        | -        | +      | +      |
| Endocrine               | Subclinical hypothyroidism               | -        | -        | -      | -      |
|                         | Precocious puberty                       | -        | NA       | -      | NA     |
|                         | Hypercalcemia                            | -        | -        | -      | -      |
|                         | Glucose intolerance or diabetes mellitus | -        | -        | -      | -      |
| Gastrointestinal        | Feeding difficulties                     | -        | -        | +      | +      |
|                         | Abnormal weight gain                     | -        | -        | +      | +      |
|                         | Celiac disease                           | -        | -        | -      | -      |
|                         | Constipation                             | -        | +        | -      | +      |
|                         | Gastroesophageal reflux                  | -        | +        | +      | +      |
|                         | Abdominal pain (unclear cause)           | -        | -        | -      | -      |
|                         | Rectal prolapse                          | -        | -        | -      | -      |
| Genitourinary           | Congenital malformation                  | -        | -        | -      | -      |
|                         | Enuresis                                 | -        | -        | -      | -      |
| Ocular                  | Strabismus                               | +        | +        | +      | +      |
|                         | Hypermetropia                            | -        | -        | -      | -      |
| Musculoskeletal         | Kyphosis                                 | +        | -        | +      | +      |
|                         | Hyperlordosis                            | -        | -        | +      | -      |
|                         | Radioulnar synostosis                    | -        | -        | -      | -      |
|                         | Umbilical hernia                         | -        | -        | -      | +      |
| Other                   | Hoarse voice                             | -        | +        | +      | +      |
|                         | Hyperacusis                              | +        | +        | +      | +      |
|                         | Epilepsy                                 | -        | -        | +      | -      |
|                         | Scoliosis                                | -        | -        | +      | -      |

giuseppe merla 28-1-13 10:34  
Eliminato: +
