# Supplementary material
Source: PubMed Central journal article supplement (PMC3865388)
Supplement: ejhg2013101x4.pdf [file ejhg2013101x4.pdf]

**Table S2. Oligos utilized for qPCR.** Sequences are based on the UCSC GRCh37/hg19 assembly.

| Assay              | Forward                     | Reverse                  | amplicon size (bp) | Position          | Band    |
|--------------------|-----------------------------|--------------------------|--------------------|-------------------|---------|
| Q8N8C3             | CGCAGCTTGCATTCTTAGCTT       | AGGCTGAGTTTTCTGACTTGC    | 82                 | 70600938-70601020 | 7q11.22 |
| WBSR17             | AAAATTCTCCTTCTGGCCCC        | TTGCCTAGCACAAACCCCC      | 64                 | 70793911-70793974 | 7q11.22 |
| 200Kb outWBScentro | GCCTAAAGTGCTTGGAACAG        | TCTCCCCAACACCATGGT       | 65                 | 70842404-70842468 | 7q11.22 |
| FZD9               | CATCATCTTCTCTCCATGTGCTA     | GCCACCGCACGGATCA         | 64                 | 72849135-72849199 | 7q11.23 |
| BAZ1B_17.02        | AGGCCACATCCACTGTGACCATCACCC | GGCCTGTGGAGTGCAGCCCTGCTT | 61                 | 72873625-72873685 | 7q11.23 |
| BAZ1B_17.01        | AGGGCGCTCCTCTTGTCTCCCT      | TGCCTCCTGCAGCCCTACACCTCA | 73                 | 72892307-72892379 | 7q11.23 |
| BAZ1B              | AGTTACTTGGCGTTTGAATTTGG     | GGCAACTTTCACACAAAAACC    | 72                 | 72926918-72926990 | 7q11.23 |
| BCL7B              | AGGCGTGCACAGGCTATCA         | CTCCCTGGCTCGCATAGGT      | 67                 | 72956419-72956353 | 7q11.23 |
| TBL2               | CTGTCTGTCACTAGCCTCTGCA      | CCAGGCCCTTCGGCA          | 67                 | 72996421-72996487 | 7q11.23 |
| MLXIPL             | CACGCATTTCTGATTCCCATT       | GCAGGCGGTCTGCGC          | 61                 | 73038261-73038321 | 7q11.23 |
| DNAJC30            | CCTGCCCCGCATGTGT            | TGGTCACATTGCACATTTCAAG   | 54                 | 73096643-73096697 | 7q11.23 |
| WBSR21             | CAGCTGGGTGGAGCAAGC          | AGGGAGTGCCTTGCTGGG       | 63                 | 73149312-73149374 | 7q11.23 |
| CLDN4              | AACACAGGTGGACCATGCTAGA      | GGATCTGTTGACCGGTAATG     | 66                 | 73243525-73243590 | 7q11.23 |
| ELN                | GGCATGAGACGCTCCACAT         | TTCTGAGCCAGGGCAACAC      | 67                 | 73452977-73453043 | 7q11.23 |
| RFC2               | TGACAACCCCTTGCCAC           | TGCCATATTTGGTAATGCGC     | 59                 | 73655816-73655874 | 7q11.23 |
| CYLN2/RCF2         | ACTCATGACACACCGGCTTTT       | CAAGCTGCTGTCTCTCAAGTTT   | 68                 | 73691389-73691456 | 7q11.23 |
| CYLN2              | CTGCTCTTCTCCTGTGGCT         | AGCTGTTGCCAGGTCTT        | 64                 | 73757637-73757700 | 7q11.23 |
| CYLN2/GTF2IRD1     | TCCACTGAGACTTGGTGAGC        | GTTAGGCAGACTGTGCTCCA     | 75                 | 73854833-73854907 | 7q11.23 |
| GTF2IRD1_4.12      | CCCAGTCTCAGGACGTAAGT        | GGTGGACACAGCAATACCAG     | 58                 | 73887627-73887684 | 7q11.23 |
| GTF2IRD1_4.1       | GAGGGCTCAGCCCCATA           | AATGGGAGGCAGCAACCA       | 64                 | 73950180-73950243 | 7q11.23 |
| GTF2I              | TTGGCCCTTCGATCAGTT          | ACAGCATTCTATCTCCCCATGTC  | 62                 | 74114381-74114443 | 7q11.23 |
| WBSR16             | CATGCTTTGTGGAACTGCTT        | AGAGGACAGCAGTGTGAATCCA   | 71                 | 74486539-74486609 | 7q11.23 |
| 50Kb outWBSelo     | TGCGCTCCAACGAATCCT          | GCCAGACAAGCCAGGTAGA      | 64                 | 75186981-75187044 | 7q11.23 |
| HIP1               | GTGCCAGGGTCATCCC            | AACCTGGAGTCTGGTTTTGAA    | 62                 | 75362512-75362573 | 7q11.23 |
| CCL26              | TTTGATCATAACACAAGCCAGGA     | CCCCCAGTTCCTGCTG         | 67                 | 75404917-75404983 | 7q11.23 |
| 400Kb outWBSelo    | CACCAAAGACTGGCGTTTCC        | GCGGACCCAGATTTCTTGAC     | 72                 | 75595674-75595745 | 7q11.23 |
| MDH2               | TACGCTAGAACCCAGCCAAAC       | GGGAGTCGAAAGGAAAGCT      | 66                 | 75677247-75677312 | 7q11.23 |
| YWHAG              | GGCTGTGTGCCAGGATGTG         | TCTCGCTGCAATCTTGATCA     | 61                 | 75959295-75959356 | 7q11.23 |
| SRCRB4D            | TGAGATGTGGGTCGGGACAT        | GATCTTTGGAGGTAGCCCTGATC  | 66                 | 76039171-76039236 | 7q11.23 |
| DTX2               | GAGATGGACCGCAACATTACG       | CCAGCACGTTCTGCAGGTAGT    | 64                 | 76134805-76134868 | 7q11.23 |
| POMZP3             | GTTTCCCCTTGACTCTAT          | TGGAGGTGGCCTCTGTATCTTT   | 67                 | 76254790-76254765 | 7q11.23 |
| CCDC146            | GCTGCATGGTCACCTTGGAT        | AGTCCACCCTCTCCAAAACA     | 58                 | 76751916-76751973 | 7q11.23 |
| PTPN12             | ACCGCTTGCCTCTTGATGAG        | TGGCATTTTCAGGTCCATGA     | 63                 | 77256567-77256629 | 7q11.23 |
| MAGI2              | TGCTCCTCCATCCTCATCTCT       | CCTCAGTTCCTGGGCTCCTT     | 64                 | 79082654-79082717 | 7q21.11 |
| 13384hsacgh-21-1A  | TCTCGATTCTTTAGCGTCAACT      | GCTCAGCTCAGGATGCAGAAA    | 76                 | 15859275-15859350 | 21q11.2 |
| 13388hsacgh-21-3A  | CCACCTCAAGTATACCGAAGTCCTA   | GGAAGCGCTGCATGTGAA       | 68                 | 22667404-22667471 | 21q21.1 |
