# Supplementary material
Source: PubMed Central journal article supplement (PMC3865388)
Supplement: ejhg2013101x5.pdf [file ejhg2013101x5.pdf]

**Table S3. CGH-array analysis results from all four patients.** Genomic position of the normal proximal (centromeric), normal distal (telomeric), deleted proximal, and deleted distal SNPs are indicated. The genes comprise in the minimum deletion sizes are reported.

| ID sample     | Normal proximal SNP(2X) | Normal distal SNP(2X) | Size (bp) | Deleted proximal SNP(1X) | Deleted distal SNP(1X) | Size (bp) | Deleted genes (from UCSC Genome Browser - GRCh37/hg19 Assembly)                                                                                                                                                                                                                                                                                                                                                                                                                                                                                                       |
|---------------|-------------------------|-----------------------|-----------|--------------------------|------------------------|-----------|-----------------------------------------------------------------------------------------------------------------------------------------------------------------------------------------------------------------------------------------------------------------------------------------------------------------------------------------------------------------------------------------------------------------------------------------------------------------------------------------------------------------------------------------------------------------------|
| <b>WBS154</b> | 73084829                | 74141494              | 1056665   | 73092574                 | 74141493               | 1048919   | DNAJC30, WBSR22, STX1A, MIR4284, WBSR26, ABHD11, CLDN3, CLDN4, WBSR27, WBSR28, ELN, LIMK1, EIF4H, MIR590, LAT2, RFC2, CLIP2, GTF2IRD1, GTF2I                                                                                                                                                                                                                                                                                                                                                                                                                          |
| <b>WBS166</b> | 72974941                | 74005325              | 1030384   | 72974959                 | 74005314               | 1030355   | TBL2, MLXIPL, VPS37D, DNAJC30, WBSR22, STX1A, MIR4284, WBSR26, ABHD11, CLDN3, CLDN4, WBSR27, WBSR28, ELN, LIMK1, EIF4H, MIR590, LAT2, RFC2, CLIP2, GTF2IRD1                                                                                                                                                                                                                                                                                                                                                                                                           |
| <b>WBS160</b> | 72472940                | 76709600              | 4236660   | 72473032                 | 76696036               | 4223004   | STAG3L3, PMS2L2, SPDYE8P, LOC100093631, GTF2IP1, GTF2IRD2P1, NSUN5, TRIM50, FKBP6, FZD9, BAZ1B, BCL7B, TBL2, MLXIPL, VPS37D, DNAJC30, WBSR22, STX1A, MIR4284, WBSR26, ABHD11, CLDN3, CLDN4, WBSR27, WBSR28, ELN, LIMK1, EIF4H, MIR590, LAT2, RFC2, CLIP2, GTF2IRD1, GTF2I, NCF1, GTF2IRD2, STAG3L2, PMS2P5, GATSL1, WBSR16, GTF2IRD2B, NCF1C, GTF2IP1, LOC100093631, POM121C, SPDYE5, PMS2P3, HIP1, CCL26, CCL24, RHBDD2, POR, SNORA14A, TMEM120A, STYXL1, MDH2, SRRM3, HSPB1, YWHAG, SRCRB4D, ZP3, DTX2, FDPSL2A, UPK3B, LOC100133091, POMZP3, PMS2P11, LOC100132832 |
| <b>WBS179</b> | 72556174                | 76711902              | 4155728   | 72556216                 | 76709600               | 4153384   | LOC100093631, GTF2IP1, NCF1B, GTF2IRD2P1, NSUN5, TRIM50, FKBP6, FZD9, BAZ1B, BCL7B, TBL2, MLXIPL, VPS37D, DNAJC30, WBSR22, STX1A, MIR4284, WBSR26, ABHD11, CLDN3, CLDN4, WBSR27, WBSR28, ELN, LIMK1, EIF4H, MIR590, LAT2, RFC2, CLIP2, GTF2IRD1, GTF2I, NCF1, GTF2IRD2, STAG3L2, PMS2P5, GATSL1, WBSR16, GTF2IRD2B, NCF1C, GTF2IP1, LOC100093631, POM121C, SPDYE5, PMS2P3, HIP1, CCL26, CCL24, RHBDD2, POR, SNORA14A, TMEM120A, STYXL1, MDH2, SRRM3, HSPB1, YWHAG, SRCRB4D, ZP3, DTX2, FDPSL2A, UPK3B, LOC100133091, POMZP3, PMS2P11, LOC100132832                    |
